tency of health care personnel yet enables the licentiates to capture an area of work and protect themselves from competition. This is illustrated by the recent antitrust action by the federal government against the AMA over the accreditation process: the Justice Department contends that it limits competition in health care. Cohen also mentions new regulations that are being instituted to control cost and quality, but points out the difficulties that stand in the way of regulating such complex activities. The possibility of medicine's becoming a public utility for purposes of regulation is hindered by the fact that the utilities often seem to "capture" the bodies organized to regulate them. McGraw's article points out the failure of the planners' hopes that Medicare would provide the basis for the development of professional teams in health care. He believes that in the future medical care and medical education will be in the "matrix mode" and that the traditional academic and professional identity is going

out of style. Specific discussions of training for Registered Record Administration, Physical Therapists, Mental Health Workers, and Environmental Health Specialists seem not to agree with the thesis is expounded by McGraw. Rather, it would appear that new personnel are being trained to meet new demands and that their training programs are being continuously upgraded as the groups mature.

Modest as the interest of this volume may be to the practicing anesthesiologist, the education of Allied Health personnel will have a profound effect on our practice in future years.

JOHN E. STEINHAUS, M.D.  
Department of Anesthesiology  
Emory University School of Medicine  
1365 Clifton Road, N.E.  
Atlanta, Georgia 30322

### Books Received

| Title & Edition                                                                                                                                                                                                                                                      | Author/Editor              | Publisher                                       |       |         |
|----------------------------------------------------------------------------------------------------------------------------------------------------------------------------------------------------------------------------------------------------------------------|----------------------------|-------------------------------------------------|-------|---------|
|                                                                                                                                                                                                                                                                      |                            | Address, Name, Year                             | Pages | Price   |
| <b>Stress and the Heart: Interactions of the Cardiovascular System, Behavioral State, and Psychotropic Drugs</b>                                                                                                                                                     | D. Wheatley<br>(Editor)    | New York<br>Raven Press<br>1977                 | 272   | \$15.00 |
| <i>Psychopharmacological interactions of the cardiovascular system, anxiety, psychotropic drugs, and stress factors.</i>                                                                                                                                             |                            |                                                 |       |         |
| <b>Basic Surgery</b>                                                                                                                                                                                                                                                 | J. A. McCredie<br>(Editor) | New York<br>Macmillan<br>1977                   | 660   | \$15.95 |
| <i>A guide to understanding pathophysiologic processes and clinical phenomena.</i>                                                                                                                                                                                   |                            |                                                 |       |         |
| <b>Blood Transfusion for Clinicians</b>                                                                                                                                                                                                                              | J. Wallace                 | New York<br>Churchill Livingstone<br>1977       | 351   | \$22.50 |
| <i>Attempts a simple, comprehensive account of the general principles.</i>                                                                                                                                                                                           |                            |                                                 |       |         |
| <b>Operative Obstetrics (Ninth edition)</b>                                                                                                                                                                                                                          | M. Kerr                    | Baltimore<br>Williams & Wilkins<br>1977         | 882   | \$48.00 |
| <i>Contains a new chapter on anesthesia and analgesia by Dr. James Wilson, of the Royal Infirmary, Edinburgh.</i>                                                                                                                                                    |                            |                                                 |       |         |
| <b>Physiology of the Heart &amp; Circulation</b>                                                                                                                                                                                                                     | R. C. Little               | Chicago<br>Year Book Medical Publishers<br>1977 | 334   | PNS     |
| <i>A concise review for physicians and graduate students. Cardiac structure; biophysics of the cardiac cell; dynamics of the heartbeat; electrocardiography; output of the heart; energetics; hemodynamics; regulation of blood pressure; regional circulations.</i> |                            |                                                 |       |         |
| <b>Anesthesia and Respiratory Function</b>                                                                                                                                                                                                                           | E. R. Kafer<br>(Editor)    | Boston<br>Little, Brown<br>1977                 | 205   | PNS     |
| <i>Seven chapters highlight advances in the evaluation of respiratory regulation, gas exchange, mechanical properties and bronchomotor tone during anesthesia.</i>                                                                                                   |                            |                                                 |       |         |
| <b>Pulmonary Aspiration</b>                                                                                                                                                                                                                                          | R. B. Roberts<br>(Editor)  | Boston<br>Little, Brown<br>1977                 | 153   | PNS     |
| <i>Attempts to cover all those instances in which the anesthesiologist may be involved—surgical patients, obstetrical patients, the intensive care unit, infants, drowning.</i>                                                                                      |                            |                                                 |       |         |

Books Received (Continued)

| Title & Edition                                                                                                                                                                                                                                                            | Author/Editor                                            | Publisher                                                  |       |         |
|----------------------------------------------------------------------------------------------------------------------------------------------------------------------------------------------------------------------------------------------------------------------------|----------------------------------------------------------|------------------------------------------------------------|-------|---------|
|                                                                                                                                                                                                                                                                            |                                                          | Address, Name, Year                                        | Pages | Price   |
| <b>Obstetric Anaesthesia and Analgesia</b>                                                                                                                                                                                                                                 | D. D. Moir                                               | Baltimore<br>Williams and Wilkins<br>1977                  | 293   | \$23.95 |
| <i>A comprehensive guide to safe anesthesia and effective analgesia in childbirth, with chapters on history, physiology, pharmacology, modern management of pregnancy and labor, general anesthesia, regional anesthesia, complications, resuscitation of the newborn.</i> |                                                          |                                                            |       |         |
| <b>Metabolism of Volatile Anesthetics</b>                                                                                                                                                                                                                                  | E. N. Cohen<br>R. A. Van Dyke                            | Addison-Wesley Publishing<br>Co., Inc.<br>1977             | 248   | \$18.00 |
| <i>Surveys the general background, major research, important current thinking, and directions for future study, in vitro, in animals, and in man.</i>                                                                                                                      |                                                          |                                                            |       |         |
| <b>Pain: A Source Book for Nurses and Other Health Professionals</b>                                                                                                                                                                                                       | A. K. Jacox                                              | Boston<br>Little, Brown<br>1977                            | 535   | PNS     |
| <i>A comprehensive overview of clinical pain: general considerations of pain and pain assessment; pain alleviation in specific groups; annotated bibliography of pain literature.</i>                                                                                      |                                                          |                                                            |       |         |
| <b>Clinical Application of Blood Gases</b><br>(Second edition)                                                                                                                                                                                                             | B. A. Shapiro<br>R. A. Harrison<br>J. R. Walton          | Chicago<br>Year Book Medical Publishers<br>1977            | 284   | PNS     |
| <i>Expanded in scope and depth, this book provides a clinical introduction for medical students and physicians.</i>                                                                                                                                                        |                                                          |                                                            |       |         |
| <b>Facial Pain</b><br>(Second edition)                                                                                                                                                                                                                                     | C. C. Alling, III<br>P. E. Mahan                         | Philadelphia<br>Lea and Febiger<br>1977                    | 286   | \$22.00 |
| <i>"My face is my fortune, Sci." Study and treatment of several of the healing sciences, of interest to laboratory scientists, clinicians and trainees.</i>                                                                                                                |                                                          |                                                            |       |         |
| <b>Clinical and Resuscitative Data</b>                                                                                                                                                                                                                                     | R. P. H. Dunnhill<br>B. E. Crawley                       | Oxford, England<br>Blackwell Scientific Publishers<br>1977 | 427   | \$26.50 |
| <i>Compendium of data and formulas often hard to find but needed quickly in resuscitation procedures.</i>                                                                                                                                                                  |                                                          |                                                            |       |         |
| <b>Surgery Annual: Nineteen Seventy-Seven,</b><br>Volume 9                                                                                                                                                                                                                 | L. M. Nyhus<br>(Editor)                                  | New York<br>Appleton-Century-Crofts<br>1977                | 427   | \$26.50 |
| <i>Compactly presents the recent major advances in diverse areas, including anesthesia.</i>                                                                                                                                                                                |                                                          |                                                            |       |         |
| <b>Clinical Physiology for the Anesthesiologist</b>                                                                                                                                                                                                                        | A. B. Silber                                             | Moscow, Russia<br>1977                                     | 431   | PNS     |
| <i>Professor and Chairman of the Department of Intensive Care, Anesthesia and Resuscitation, Petrozavodsk University Medical School. Written in Russian.</i>                                                                                                               |                                                          |                                                            |       |         |
| <b>Immunology, A Programmed Text</b>                                                                                                                                                                                                                                       | J. W. Streilein<br>J. D. Hughes                          | Boston<br>Little, Brown<br>1977                            | 337   | PNS     |
| <i>Presents the basic elements of immunology in self-instruction form.</i>                                                                                                                                                                                                 |                                                          |                                                            |       |         |
| <b>Long-term Surgical Results in Children</b>                                                                                                                                                                                                                              | P. P. Rickham<br>W. Ch. Hecker<br>J. Prevot<br>(Editors) | Baltimore<br>Urban & Schwarzenberg<br>1977                 | 322   | \$29.50 |
| <i>Papers from a symposium in Munich, 1975.</i>                                                                                                                                                                                                                            |                                                          |                                                            |       |         |
| <b>Review of Physiological Chemistry</b><br>(16th edition)                                                                                                                                                                                                                 | H. A. Harper<br>V. W. Rodwell<br>P. A. Mayes             | Los Altos<br>Lange Medical Publications<br>1977            | 681   | \$13.00 |
| <i>A reorganized, reasonably concise presentation of those aspects of chemistry most relevant to the study of biology and medicine.</i>                                                                                                                                    |                                                          |                                                            |       |         |

## Books Received (Continued)

| Title & Edition                                                                                                                                                                                                  | Author/Editor                              | Publisher                                                  |               |
|------------------------------------------------------------------------------------------------------------------------------------------------------------------------------------------------------------------|--------------------------------------------|------------------------------------------------------------|---------------|
|                                                                                                                                                                                                                  |                                            | Address, Name, Year                                        | Pages Price   |
| <b>Current Respiratory Care</b>                                                                                                                                                                                  | K. F. MacDonnell<br>M. Segal               | Boston<br>Little, Brown<br>1977                            | 489 PNS       |
| <i>Based on an annual inhalation and respiratory therapy postgraduate course: Instrumentation. New diagnostic techniques. Clinical topics. Therapeutic agents. Nursing care.</i>                                 |                                            |                                                            |               |
| <b>Advances and Technical Standards in Neurosurgery, Volume 4</b>                                                                                                                                                | H. Krayenbuhl,<br>(Zurich Managing Editor) | New York<br>Springer-Verlag<br>1977                        | 151 \$31.70   |
| <i>Recent advances in five important fields.</i>                                                                                                                                                                 |                                            |                                                            |               |
| <b>General Ophthalmology (Eighth edition)</b>                                                                                                                                                                    | D. Vaughan<br>T. Asbury                    | Los Altos<br>Lange Medical Publications<br>1977            | 151 \$37.50   |
| <i>A concise up-to-date review. This edition contains new chapters on the conjunctiva, the sclera, immunology, computerized tomography, and blindness.</i>                                                       |                                            |                                                            |               |
| <b>Life Support: The Essentials</b>                                                                                                                                                                              | J. S. Redding                              | Philadelphia<br>J. B. Lippincott<br>1977                   | 136 \$6.25    |
| <i>Purposes to integrate an understanding of disordered physiology with sound principles of management.</i>                                                                                                      |                                            |                                                            |               |
| <b>Anatomy for Anaesthetists</b>                                                                                                                                                                                 | H. Ellis<br>S. Feldman                     | Oxford, England<br>Blackwell Scientific Publishers<br>1977 | 397 \$31.00   |
| <i>The daily background details of respiratory, cardiac, and neurologic zones needed by anesthesiologists.</i>                                                                                                   |                                            |                                                            |               |
| <b>Obstetrics &amp; Gynecology (Sixth edition)</b>                                                                                                                                                               | R. C. Benson                               | Los Altos<br>Lange Medical Publications<br>1977            | 772 \$9.50    |
| <i>Extensively revised digest for students and busy practitioners.</i>                                                                                                                                           |                                            |                                                            |               |
| <b>Review of Medical Physiology (Eighth edition)</b>                                                                                                                                                             | W. F. Ganong                               | Los Altos<br>Lange Medical Publications<br>1977            | 599 \$12.50   |
| <i>Concise summary update from the Department of Physiology of the University of California School of Medicine, San Francisco.</i>                                                                               |                                            |                                                            |               |
| <b>Ventilation/Blood Flow and Gas Exchange (Third edition)</b>                                                                                                                                                   | J. B. West                                 | Philadelphia<br>J. B. Lippincott<br>1977                   | 113 PNS       |
| <i>Pocket-sized monograph modified to incorporate recent measurements.</i>                                                                                                                                       |                                            |                                                            |               |
| <b>Current Surgical Diagnosis &amp; Treatment (Third edition)</b>                                                                                                                                                | J. E. Dunphy<br>L. W. Way                  | Los Altos<br>Lange Medical Publications<br>1977            | 1,139 \$18.00 |
| <i>Several chapters have been rewritten and all the bibliographies updated since 1975, the date of the second edition.</i>                                                                                       |                                            |                                                            |               |
| <b>Local Anesthetics (Second edition)</b>                                                                                                                                                                        | R. H. de Jong                              | Springfield, Ill.<br>Charles C Thomas<br>1977              | 338 \$32.50   |
| <i>A wholly new text that tells what local anesthetics are, what they do, how, where, and when they do it, how they get in, and how they get out.</i>                                                            |                                            |                                                            |               |
| <b>Medicine for Anaesthetists</b>                                                                                                                                                                                | M. D. Vickers                              | Philadelphia<br>J. B. Lippincott Co.<br>1977               | 571 \$59.50   |
| <i>Can the patient condition be improved in the time available? How does one decide when the situation is optimal? What else might go wrong with the patient? 17 chapters instruct both learner and teacher.</i> |                                            |                                                            |               |
